# Supplementary material for: Upper Arctic Ocean water masses harbor distinct communities of heterotrophic flagellates
Source: Copernicus journal article supplement (doi:10.5194/bg-10-4273-2013), 2013-06-27
Supplement: Supplementary file 1 [file bg-10-4273-2013-supplement.pdf]

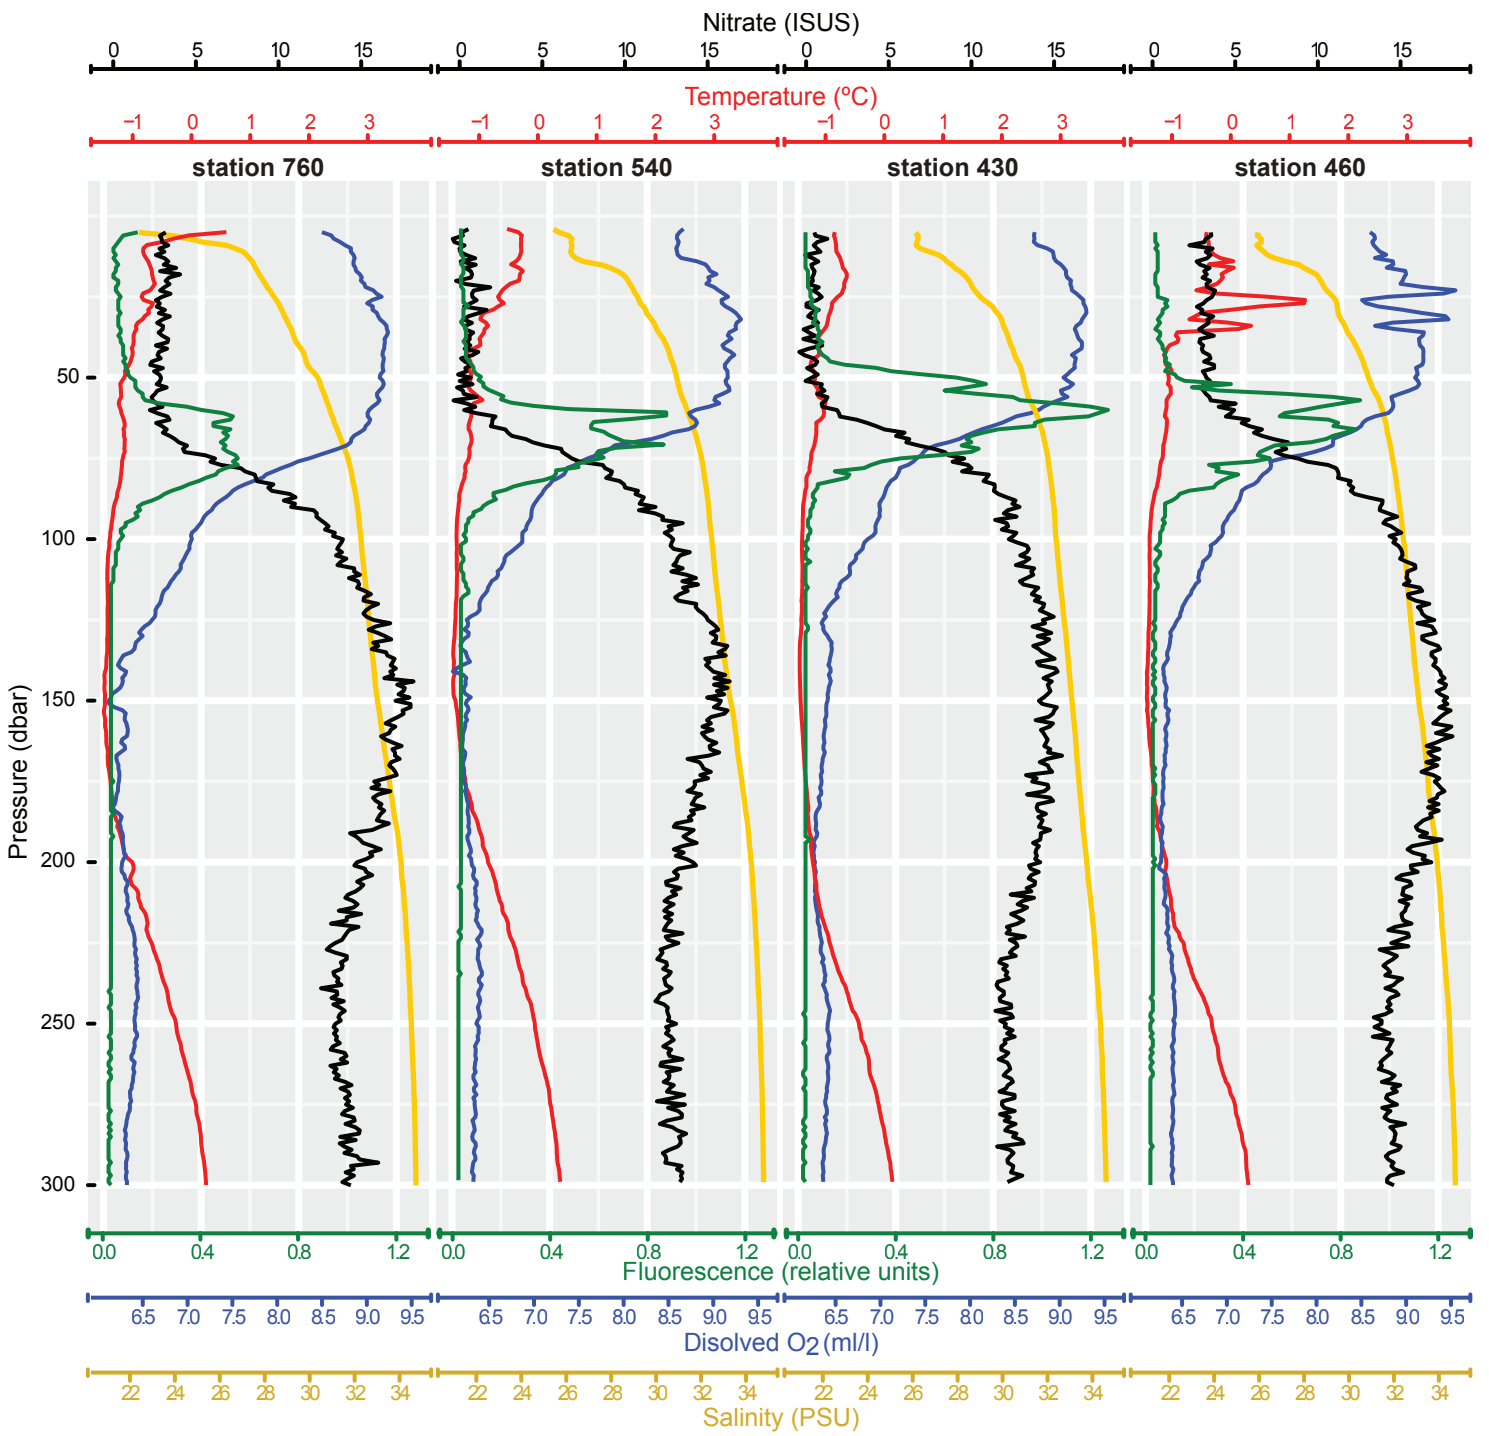

Figure S1

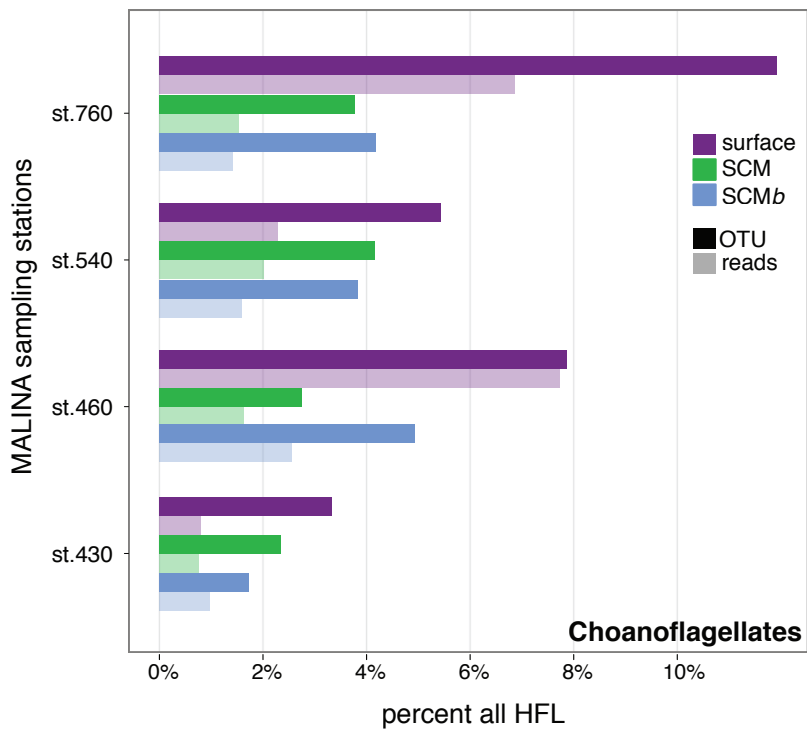

**Figure S2**

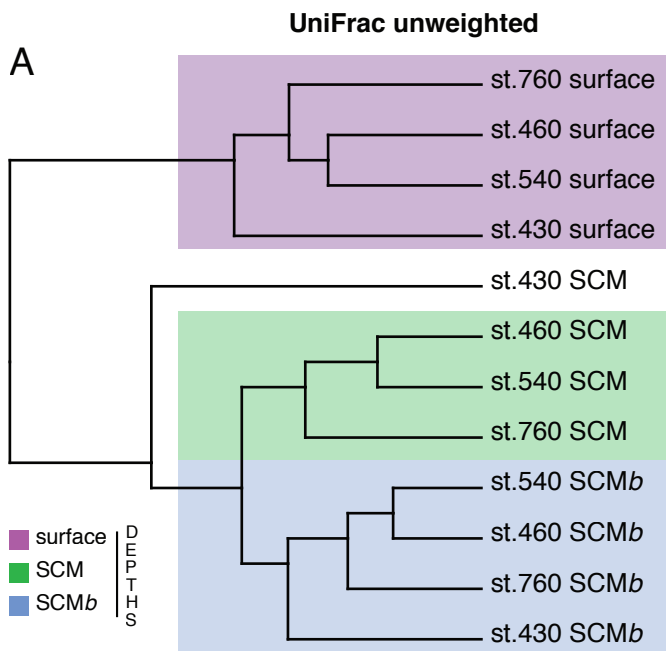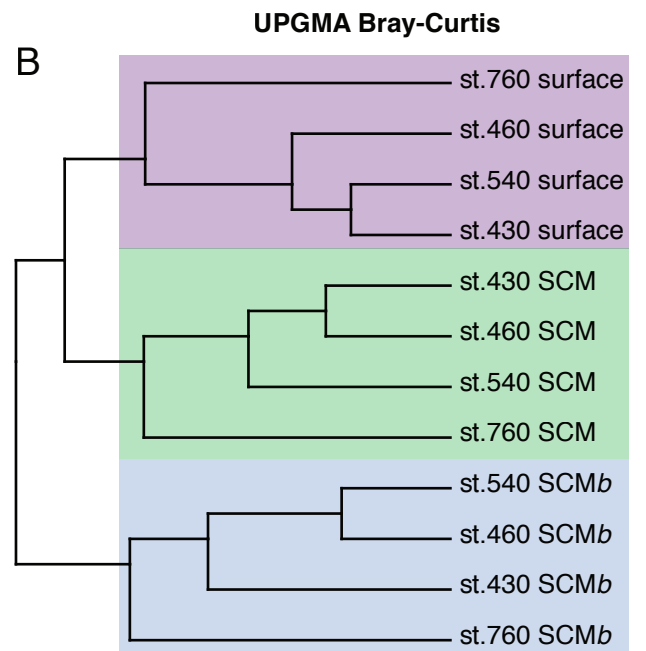

**Figure S3**

Picozoa

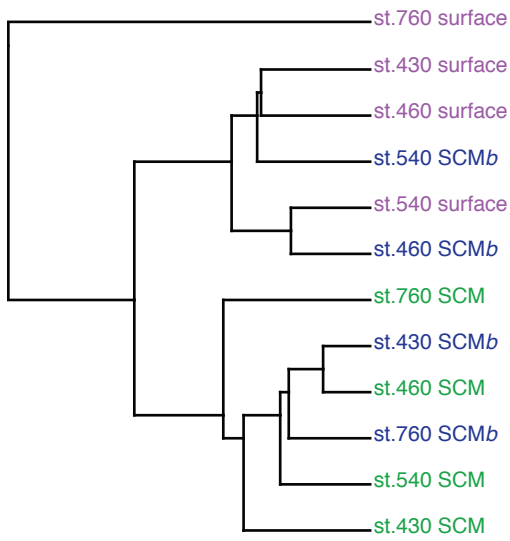

Choanoflagellates

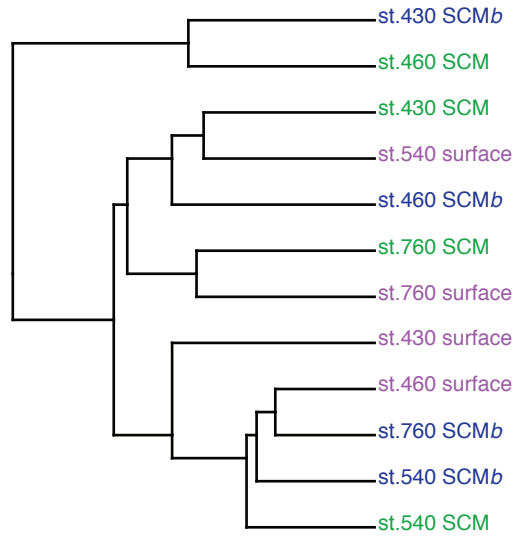

MASTs

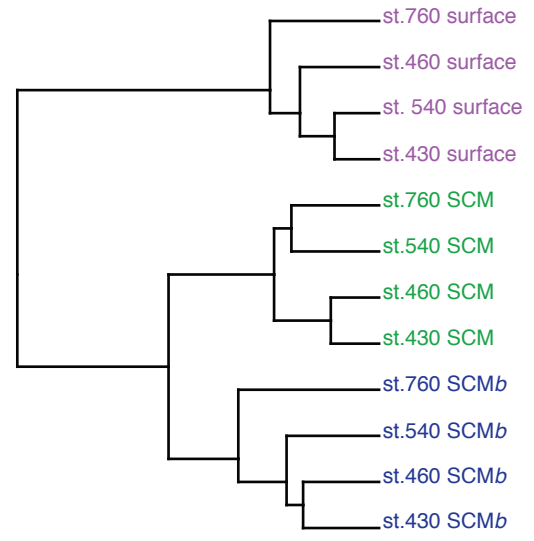

Rhizaria

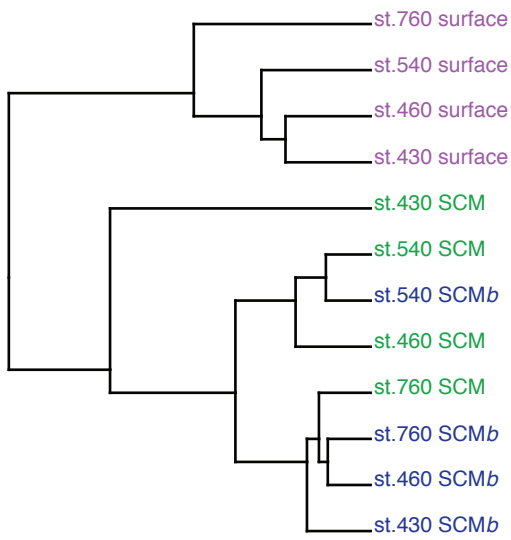

Telonemia

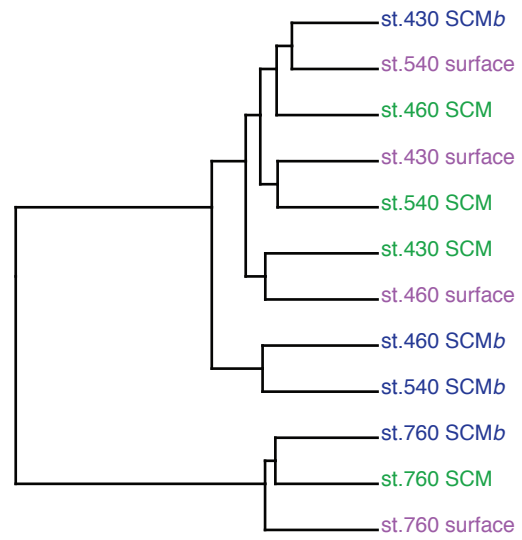

Figure S4

**Table S1.** Additional metadata for the sampled Beaufort Sea stations and depths.

| Station | Depth   | Chl <i>a</i> total<br>( $\mu\text{g.l}^{-1}$ ) | Chl <i>a</i> small<br>( $\mu\text{g.l}^{-1}$ ) | Bacterial Abundance<br>( $\text{cell.ml}^{-1}$ ) | DOC<br>( $\mu\text{mol.l}^{-1}$ ) | POC<br>( $\mu\text{M}$ ) |
|---------|---------|------------------------------------------------|------------------------------------------------|--------------------------------------------------|-----------------------------------|--------------------------|
| 430     | Surface | 0.075                                          | 0.069                                          | 238,830                                          | 68.2                              | 1.762                    |
| 430     | SCMa    | 0.765                                          | 0.647                                          | 360,052                                          | n.a.                              | 3.109                    |
| 430     | SCM     | 0.604                                          | 0.552                                          | 447,085                                          | 68.4                              | 2.384                    |
| 430     | SCMb    | 0.073                                          | 0.059                                          | 169,411                                          | n.a.                              | n.a.                     |
| 460     | Surface | 0.071                                          | 0.062                                          | n.a.                                             | 67.0                              | 2.823                    |
| 460     | SCMa    | 0.069                                          | 0.061                                          | n.a.                                             | n.a.                              | 1.176                    |
| 460     | SCM     | 0.577                                          | 0.505                                          | n.a.                                             | 68.8                              | 2.823                    |
| 460     | SCMb    | 0.161                                          | 0.119                                          | n.a.                                             | n.a.                              | 1.882                    |
| 540     | Surface | 0.079                                          | 0.068                                          | 193,087                                          | 65.8                              | 1.679                    |
| 540     | SCMa    | 0.121                                          | 0.112                                          | 266,374                                          | n.a.                              | 1.399                    |

---

|     |                  |       |       |         |      |       |
|-----|------------------|-------|-------|---------|------|-------|
| 540 | SCM              | 0.612 | 0.548 | 221,987 | 69.1 | 1.772 |
| 540 | SCM <sup>b</sup> | 0.216 | 0.194 | 137,003 | n.a. | 0.840 |
| 760 | Surface          | 0.107 | 0.093 | 395,137 | 78.3 | 3.552 |
| 760 | SCM <sup>a</sup> | 0.105 | 0.092 | 366,178 | n.a. | n.a.  |
| 760 | SCM              | 0.396 | 0.355 | 306,567 | 70.4 | 1.375 |
| 760 | SCM <sup>b</sup> | 0.104 | 0.088 | 162,854 | n.a. | 0.687 |

---

**Table S2.** Overall pyroread and OTU statistics.

| Station | Depth        | Raw Pyroreads | QC Pyroreads* | Final OTUs | HFL reads (%) | HFL OTUs (%) |
|---------|--------------|---------------|---------------|------------|---------------|--------------|
| 430     | Surface      | 5630          | 4231          | 843        | 17.25         | 21.47        |
| 430     | SCM          | 11260         | 8134          | 1299       | 6.33          | 13.09        |
| 430     | SCM <i>b</i> | 5630          | 3672          | 1058       | 13.81         | 16.35        |
| 460     | Surface      | 5630          | 3741          | 897        | 14.84         | 18.39        |
| 460     | SCM          | 11260         | 8035          | 1456       | 7.55          | 12.43        |
| 460     | SCM <i>b</i> | 5630          | 3563          | 1067       | 25.26         | 22.77        |
| 540     | Surface      | 5630          | 4075          | 890        | 20.67         | 17.08        |
| 540     | SCM          | 11260         | 8136          | 1661       | 17.34         | 12.14        |
| 540     | SCM <i>b</i> | 5630          | 3494          | 1083       | 23.18         | 21.61        |
| 760     | Surface      | 5630          | 3521          | 822        | 21.93         | 21.41        |
| 760     | SCM          | 11260         | 5874          | 1357       | 13.21         | 17.54        |
| 760     | SCM <i>b</i> | 5630          | 2933          | 1038       | 28.74         | 23.03        |

\*: Quality-controlled pyroreads; removal of chimeras, sequences shorter than 300 nucleotides, metazoan-like sequences and sequences from singleton OTUs.

**Table S3.** Overall HFL pyroread and OTU statistics.

| Station | Depth            | HFL |     | Picoz |      | Choano |      | MASTs |      | Rhizaria |      | Telo |      |
|---------|------------------|-----|-----|-------|------|--------|------|-------|------|----------|------|------|------|
|         |                  | R#  | O#  | R%    | O%   | R%     | O%   | R%    | O%   | R%       | O%   | R%   | O%   |
| 430     | Surface          | 730 | 181 | 16.1  | 19.8 | 0.8    | 3.3  | 35.8  | 30.3 | 4.1      | 7.7  | 42.7 | 37.5 |
| 430     | SCM              | 515 | 170 | 20.1  | 25.8 | 0.7    | 2.3  | 47.9  | 28.8 | 5.2      | 11.7 | 25.4 | 31.1 |
| 430     | SCM <sub>b</sub> | 507 | 173 | 1.7   | 3.4  | 0.9    | 1.7  | 21.7  | 18.7 | 55.8     | 53.7 | 19.7 | 23.1 |
| 460     | Surface          | 555 | 165 | 10.6  | 14.5 | 7.7    | 7.8  | 50    | 33.9 | 5.5      | 10.9 | 25.9 | 32.7 |
| 460     | SCM              | 607 | 181 | 16.8  | 17.6 | 1.6    | 2.7  | 40.2  | 29.2 | 9.3      | 20.9 | 31.9 | 29.2 |
| 460     | SCM <sub>b</sub> | 900 | 243 | 4.4   | 6.9  | 2.5    | 4.9  | 9.6   | 11.9 | 74.3     | 62.5 | 9    | 13.5 |
| 540     | Surface          | 696 | 184 | 18.1  | 23.9 | 2.2    | 5.4  | 35.4  | 27.7 | 3.3      | 8.6  | 40.8 | 34.2 |
| 540     | SCM              | 988 | 288 | 34.2  | 24.3 | 2      | 4.1  | 26    | 21.5 | 15.5     | 24.6 | 22.1 | 25.3 |
| 540     | SCM <sub>b</sub> | 810 | 234 | 3.9   | 7.2  | 1.6    | 3.8  | 7.2   | 10.2 | 77.1     | 60.6 | 9.8  | 17.5 |
| 760     | Surface          | 772 | 176 | 5.3   | 10.8 | 6.8    | 11.9 | 48.7  | 31.8 | 0.4      | 9    | 34.9 | 35.8 |
| 760     | SCM              | 776 | 238 | 25.7  | 21   | 1.5    | 3.7  | 20.4  | 15.1 | 22.2     | 33.1 | 29.7 | 26.4 |
| 760     | SCM <sub>b</sub> | 843 | 239 | 3.4   | 7.5  | 1.4    | 4.1  | 7.5   | 11.3 | 77.7     | 61.9 | 9.7  | 14.6 |

R#: pyroread number; O#: OTU number; R%: pyroread percent (out of total HFL pyroreads); O%: OTU percent (out of total HFL OTUs); Picoz: Picozoa; Choano: Choanoflagellates; Telo: Telonemia.
